# Supplementary material for: Comment on “Noble gas decorated planar tetracoordinate oxygen” by K. Sarmah, F. Yashmin, A. Das, L.-X. Bai, J.-C. Guo and A. K. Guha, Phys. Chem. Chem. Phys. , 2025, 27 , 10923
Source: Royal Society of Chemistry journal article supplement (doi:10.1039/d5cp03262h), 2026-01-01
Supplement: d5cp03262h7.pdf [file d5cp03262h7.pdf]

**Comment on “Noble gas decorated planar tetracoordinate oxygen” by K. Sarmah, F. Yashmin, A. Das, L.-X. Bai, J.-C. Guo and A. K. Guha, *Phys. Chem. Chem. Phys.*, 2025, 27, 10923**

Alejandro Vásquez-Espinal<sup>a</sup>, Ricardo Pino-Rios<sup>b\*</sup>

<sup>a</sup>Química y Farmacia, Facultad de Ciencias de la Salud, Universidad Arturo Prat. Casilla 121, Iquique 1100000, Chile.

<sup>b</sup>Departamento de Ciencias Químicas, Facultad de Ciencias Exactas, Universidad Andres Bello (UNAB), Av. República 275, 8370146 Santiago, Región Metropolitana, Chile.

Correspondence: ricardo.pino.r@unab.cl

## **SUPPORTING INFORMATION**

### **COMPUTATIONAL METHODS**

The exploration of the potential energy surface (PES) was performed using the AUTOMATON program, which applies the cellular automaton criterion to generate the initial population followed by genetic algorithm operations over several iterations until the lowest energy structure (global minimum) is found. Specific technical details can be found in the original publication.

Geometrical optimizations and search procedures were initially carried out at the M06-2X/def2SVP level and subsequently refined at the M06-2X, MP2, and CCSD(T) levels for OHe<sub>4</sub><sup>2+</sup> and at the M06-2X, and MP2 levels for ONe<sub>4</sub><sup>2+</sup> using the aug-cc-pVTZ basis set. Due to the high computational cost, ONe<sub>4</sub><sup>2+</sup> could not be optimized at the CCSD(T) level.

In all cases, vibrational analyses were carried out to verify that the obtained structures correspond to true minima on their respective potential energy surfaces. Default options SCF=tight (Accuracy of 10<sup>-12</sup>), integral=ultrafine (99590 grid points) were employed.

Wavefunction analyses were performed at the CCSD level, since Gaussian16 does not provide wavefunctions at the CCSD(T) level. Accordingly, single-point CCSD calculations were conducted using the CCSD(T) geometry for  $\text{OHe}_4^{2+}$  and the MP2 geometry for  $\text{ONe}_4^{2+}$  using the density=current option in Gaussian16. Wiberg bond indices and natural population analyses (NPA) were obtained with NBO 7.0, while QTAIM analyses were performed with Multiwfn. Full reference details are provided in the original manuscript.

**Table S1.** ZPE-corrected total electronic energies (in a.u.) for  $\text{ONg}_4^{2+}$  singlet  $D_{4h}$  and triplet  $C_{2v}$  at different levels using the aug-cc-pVTZ basis set.

| $\text{ONg}_4^{2+}$ | CCSD(T)    |            | MP2         |             | M06-2X      |            |
|---------------------|------------|------------|-------------|-------------|-------------|------------|
|                     | Singlet    | Triplet    | Singlet     | Triplet     | Singlet     | Triplet    |
| $\text{OHe}_4^{2+}$ | -84.994363 | -85.013824 | -84.927452  | -84.952538  | -85.115409  | -85.139084 |
| $\text{ONe}_4^{2+}$ | ---        | ---        | -588.670641 | -588.688541 | -589.284605 | -589.32118 |

**Table S2.** Cartesian Coordinates (in Å) at the MP2/aug-cc-pVTZ level for  $\text{ONg}_4^{2+}$  at the triplet state

| OHe <sub>4</sub> <sup>2+</sup> |              |              |              | ONe <sub>4</sub> <sup>2+</sup> |              |              |              |
|--------------------------------|--------------|--------------|--------------|--------------------------------|--------------|--------------|--------------|
| M06-2X                         |              |              |              |                                |              |              |              |
| 8                              | 0.000000000  | 0.000000000  | 0.309805000  | 8                              | 0.000000000  | 0.000000000  | 0.532059000  |
| 2                              | 0.000000000  | 1.430955000  | 0.321916000  | 10                             | 0.000000000  | 1.713946000  | 0.629860000  |
| 2                              | 1.278630000  | 0.000000000  | -0.941526000 | 10                             | 1.449768000  | 0.000000000  | -0.842683000 |
| 2                              | -1.278630000 | 0.000000000  | -0.941526000 | 10                             | -1.449768000 | 0.000000000  | -0.842683000 |
| 2                              | 0.000000000  | -1.430955000 | 0.321916000  | 10                             | 0.000000000  | -1.713946000 | 0.629860000  |
| MP2                            |              |              |              |                                |              |              |              |
| 8                              | 0.000000000  | 0.000000000  | 0.330249000  | 8                              | 0.000000000  | 0.000000000  | 0.536593000  |
| 2                              | 0.000000000  | 1.413655000  | 0.316122000  | 10                             | 0.000000000  | 1.625310000  | 0.623981000  |
| 2                              | 1.311609000  | 0.000000000  | -0.976620000 | 10                             | 1.481371000  | 0.000000000  | -0.838618000 |
| 2                              | -1.311609000 | 0.000000000  | -0.976620000 | 10                             | -1.481371000 | 0.000000000  | -0.838618000 |
| 2                              | 0.000000000  | -1.413655000 | 0.316122000  | 10                             | 0.000000000  | -1.625310000 | 0.623981000  |
| CCSD(T)                        |              |              |              |                                |              |              |              |
| 8                              | 0.000000000  | 0.000000000  | -0.324918754 |                                |              |              |              |
| 2                              | -1.433164053 | 0.000000000  | -0.322675929 |                                |              |              |              |
| 2                              | 1.433164053  | 0.000000000  | -0.322675929 |                                |              |              |              |
| 2                              | 0.000000000  | -1.314772238 | 0.971884722  |                                |              |              |              |
| 2                              | 0.000000000  | 1.314772238  | 0.971884722  |                                |              |              |              |

**Table S3.** Gibbs free energies of dissociation ( $\Delta G_{\text{diss}}$ ) at 298K for the possible dissociation pathways of  $\text{ONg}_4^{2+}$  ( $\text{Ng} = \text{He}, \text{Ne}$ ) computed at the MP2/aug-cc-pVTZ level.

| Dissociation pathway |                                                                         | $\Delta G_{\text{diss}}$ (kcal·mol <sup>-1</sup> ) |                     |
|----------------------|-------------------------------------------------------------------------|----------------------------------------------------|---------------------|
|                      |                                                                         | $\text{OHe}_4^{2+}$                                | $\text{ONe}_4^{2+}$ |
| 1                    | $\text{ONg}_4^{2+} \rightarrow \text{ONg}_3^{2+} + \text{Ng}$           | -0.6                                               | 0.9                 |
| 2                    | $\text{ONg}_4^{2+} \rightarrow \text{ONg}_2^{2+} + 2\text{Ng}$          | 9.8                                                | 7.6                 |
| 3                    | $\text{ONg}_4^{2+} \rightarrow \text{ONg}_2^+ + \text{Ng}_2^+$          | -105.7                                             | -97.8               |
| 4                    | $\text{ONg}_4^{2+} \rightarrow \text{Ng}_2^+ + \text{O}^+ + 2\text{Ng}$ | -72.4                                              | -58.3               |
| 5                    | $\text{ONg}_4^{2+} \rightarrow \text{ONg}^{2+} + 3\text{Ng}$            | 12.3                                               | -123.7              |
| 6                    | $\text{ONg}_4^{2+} \rightarrow \text{O}^{2+} + 4\text{Ng}$              | 101.7                                              | 157.2               |
